# Supplementary material for: An innovative S-scheme PhC2Cu/Ag/Ag2MoO4 photocatalyst for efficient degradation of sulfamethazine antibiotics: heterojunctions and innergenerated-H2O2 promote radical production
Source: Royal Society of Chemistry journal article supplement (doi:10.1039/d3en00056g), 2023-01-01
Supplement: d3en00056g1.pdf [file d3en00056g1.pdf]

Supplementary Material for

**An innovative S-scheme  $\text{PhC}_2\text{Cu}/\text{Ag}/\text{Ag}_2\text{MoO}_4$  photocatalyst for efficient degradation of sulfamethazine antibiotics: Heterojunctions and innergenerated  $\text{H}_2\text{O}_2$  promote radical production**

*Danluo Liang <sup>a</sup>, Zili Lin <sup>a</sup>, Yuliang Wu <sup>b</sup>, Daguang Li <sup>a</sup>, Jiayi Chen <sup>a</sup>, Xiaoyu Jin <sup>a</sup>, Yingyi Chen <sup>a</sup>, Jinfan Zhang <sup>a</sup>, Haijin Liu <sup>c</sup>, Ping Chen <sup>a</sup>, Wenying Lv <sup>a</sup>, Guoguang Liu <sup>a\*</sup>.*

<sup>a</sup> Guangdong Key Laboratory of Environmental Catalysis and Health Risk Control, Guangdong-HongKong-Macao Joint Laboratory for Contaminants Exposure and Health, School of Environmental Science and Engineering, Guangdong University of Technology, Guangzhou, 510006, China

<sup>b</sup> School of Civil and Environmental Engineering, Harbin Institute of Technology, Shenzhen, 518000, China

<sup>c</sup> School of Environment, Henan Normal University, Key Laboratory for Yellow River and Huaihe River Water Environment and Pollution Control, Xinxiang 453007, China

**\* Corresponding Author:** Guoguang Liu

E-mail: [liugg615@163.com](mailto:liugg615@163.com)

Tel: +86-20-39322547

Fax: +86-20-39322548

Totally 31 pages containing 7 texts, 3 tables, and 11 figures.

## TABLE OF CONTENTS

### TEXTS

|                                                                             |    |
|-----------------------------------------------------------------------------|----|
| Text S1. Chemical reagents.....                                             | 4  |
| Text S2. Characterization methods .....                                     | 5  |
| Text S3. Photocatalytic test and determination of SMT concentration .....   | 7  |
| Text S4. Active species quantified and contributions rates of the ROS ..... | 8  |
| Text S5. Detection of H <sub>2</sub> O <sub>2</sub> .....                   | 9  |
| Text S6. The methods of theoretical calculations .....                      | 10 |
| Text S7. Identification of photocatalytic degradation intermediates .....   | 11 |

### TABLES

|                                                                                                                                                                              |    |
|------------------------------------------------------------------------------------------------------------------------------------------------------------------------------|----|
| Table S1. The fitted fluorescence decay components of PhC <sub>2</sub> Cu and PAM40. ....                                                                                    | 13 |
| Table S2. Comparison of reported literature on photocatalytic reduction of SMT .....                                                                                         | 14 |
| Table S3. Transformation products from the photocatalytic degradation of SMT under visible light irradiation. Products, labeled P1-P9 were identified by UPLC-Q-TOF MS. .... | 16 |

### FIGURES

|                                                                                                                                                   |           |
|---------------------------------------------------------------------------------------------------------------------------------------------------|-----------|
| Fig. S1. High-resolution XPS spectra of as-prepared samples: (a) C 1s, (b) O 1s. ....                                                             | 19        |
| Fig. S2. UPS spectra of PhC <sub>2</sub> Cu and AMO.....                                                                                          | 20        |
| Fig. S3. Tauc plots of PhC <sub>2</sub> Cu and AMO. ....                                                                                          | 21        |
| Fig. S4. Time-resolved fluorescence decay spectra. ....                                                                                           | 22        |
| Fig. S5. Adsorption experiments of different samples in the dark.....                                                                             | 23        |
| Fig. S6. Comparison of H <sub>2</sub> O <sub>2</sub> generation by the PhC <sub>2</sub> Cu, AMO and PAM40 systems under the same conditions. .... | 24        |
| Fig. S7. (a) Cyclic voltammogram of PhC <sub>2</sub> Cu. (b). Mott–Schottky curves of AMO at 800 HZ. ....                                         | 25        |
| Fig. S8. Schematic illustration of conventional type II heterojunctions. ....                                                                     | 26        |
| Fig. S9. The UV absorption spectra of NBT after 30 min in photocatalytic process. ....                                                            | 27        |
| Fig. S10. TOC removal rate of SMT solution following 240 min of light exposure....                                                                | 28        |
| Fig. S11. Developmental toxicity of SMT and degradation intermediates/products. ....                                                              | 29        |
| <b>REFERENCES .....</b>                                                                                                                           | <b>30</b> |

**Text S1. Chemical reagents**

Sulfamethazine (SMT), sulfoxazole (SIZ), sulfathiazole (STZ), indomethacin (IDM), diclofenac (DCF), silver nitrate ( $\text{AgNO}_3$ ),  $\text{CuCl}_2 \cdot 2\text{H}_2\text{O}$ ,  $\text{Et}_3\text{N}$ , phenyl acetylene,  $\text{Ti}(\text{SO}_4)_2$  and  $\text{Na}_2\text{MoO}_4 \cdot 2\text{H}_2\text{O}$  were obtained from Aladdin Reagent Co. Ltd. (Shanghai, China). Isopropanol (IPA), 4-hydroxy-2,2,6,6-tetramethylpiperidinyloxy (TEMPO),  $\text{H}_2\text{O}_2$  and other analytical grade reagents were obtained from Taitan (China) and used without further purification. Sodium hydroxide ( $\text{NaOH}$ ), hydrochloric acid ( $\text{HCl}$ ) were purchased from Guangzhou Chemical Reagent Factory (Guangzhou, China). Methanol and acetonitrile of HPLC grade were purchased from CNW Technologies GmbH (Germany).

## **Text S2.** Characterization methods

The crystal phases of the photocatalysts were analyzed using a Bruker AXS D8 X-ray diffractometer with Cu K $\alpha$  radiation. Scanning electronic microscopy (SEM, Hitachi S4800) and transmission electron microscopy (TEM, JEM-2100HR) equipped with an energy dispersive spectrometer (EDS) were employed to study the morphologies of the as-prepared samples. X-ray photoelectron spectroscopy (XPS, Escalab 250Xi) equipped with Mg-K $\alpha$  radiation was used to examine the chemical states of the samples. The UV-vis absorption spectra were determined by a UV-vis-NIR spectrophotometer (UV-3600Plus, Shimadzu, Japan) using BaSO<sub>4</sub> as the reflectance standard. The photoluminescence (PL) spectra were monitored with a F97pro fluorescence spectrophotometer under 360 nm excitation. Transient photoluminescence decay spectra were recorded with an Edinburgh FS5 fluorescence lifetime spectrophotometer. The total organic carbon (TOC) was detected with a TOC analyzer (TOC-V CPH E200 V, Shimadzu, Japan).

The electrochemical and photoelectrochemical tests were performed on an electrochemical workstation (CHI-760E, China) with a conventional three-electrode system in 0.1 M Na<sub>2</sub>SO<sub>4</sub> electrolyte (pH = 5.9). A saturated calomel electrode (SCE), a platinum foil, and an ITO electrode deposited with samples were used as the reference electrode, counter electrode, and working electrode, respectively. The working electrode was prepared as follows: 10 mg of the sample was added in a mixture containing 50  $\mu$ L 10% Nafion and 1 mL ethanol, and then sonicated for 30 min to form a slurry. The slurry was coated onto the surface of the ITO glass and allowed to dry

naturally. For transient photocurrent response test, a 450 nm blue LED lamp was utilized as the light source. The electrochemical impedance spectra (EIS) were recorded in the frequency range of  $10^{-2}$  to  $10^5$  Hz, and Mott-Schottky plots were collected at different frequencies of 500 and 1000 Hz.

**Text S3.** Photocatalytic test and determination of SMT concentration

SMT was employed as a model antibiotic pollutant to assess the photocatalytic capacities of the as-prepared samples under blue LED exposure. Prior the light irradiation, a 20 mg sample of the photocatalysts was dispersed in 50 mL of a 10 mg/L SMT aqueous solution and magnetically stirred for 30 min in darkness to achieve adsorption-desorption equilibrium. During light exposure, 1 mL volumes of the reaction solution were extracted and filtered at predetermined intervals.

The PPCP concentrations were determined using Shimadzu LC 20A high performance liquid chromatography (HPLC, Japan), equipped with a C18 reversed-phase column (Zorbax Eclipse,  $4.6 \times 250$  mm, 5  $\mu$ m). The temperature of column was kept at 35°C and the injection volume was set at 20  $\mu$ L. The detection wavelength of the UV detector was 262 nm. The isocratic mobile phase was made up of 70% methanol and 30% water (with 0.2% formic acid) at a flow rate of 1.0 mL min<sup>-1</sup>.

**Text S4.** Active species quantified and contributions rates of the ROS

The reactive oxygen species (ROS) generated during the photocatalytic processes were directly quantified using an ESR spectrometer (JES-FA200, Bruker Co., Germany), where 5,5-dimethyl-1-pyrroline N-oxide (DMPO) was used as the trapping reagent for superoxide radicals ( $O_2^{\bullet-}$ ) and hydroxyl radicals ( $\bullet OH$ ). To investigate the contribution rates of the reactive species to the degradation of SMT, a scavenger-quenching experiment was conducted using isopropyl alcohol (IPA), 2,2,6,6-Tetramethyl-1-piperidinyloxy (TEMPO) and methanol as scavengers for  $O_2^{\bullet-}$ ,  $\bullet OH$ , and  $h^+$ , respectively <sup>1</sup>. Further, the contributions of the RSs to the photocatalytic degradation of SMT were calculated using the equations below:

$$R_{O_2^{\bullet-}} = \frac{k_{O_2^{\bullet-}}}{k_{blank}} \approx \frac{k_{blank} - k_{TEMPO}}{k_{blank}} \quad (1)$$

$$R_{\bullet OH} = \frac{k_{\bullet OH}}{k_{blank}} \approx \frac{k_{blank} - k_{IPA}}{k_{blank}} \quad (2)$$

$$R_{h^+} = \frac{k_{h^+}}{k_{blank}} \approx \frac{k_{blank} - k_{Methanol}}{k_{blank}} \quad (3)$$

In Eqs. (1)-(3), R represents the fractional contribution of a particular reactive species to the apparent rate constant ( $k_{blank}$ ), and  $k_i$  is the rate constant of the degradation of SMT by a certain reactive species, or in the presence of a trapping reagent <sup>2</sup>.

**Text S5.** Detection of  $\text{H}_2\text{O}_2$ 

The  $\text{H}_2\text{O}_2$  concentration was determined via a (p-hydroxyphenyl) acetic acid (PPOHPAA) technique. Typically, 2.7 mg PPOHPAA and 1.0mg horseradish peroxidase were mixed in a 10 mL aqueous solution that contained a potassium hydrogen phthalate buffer solution (8.2 g/ L), which was employed as fluorescent reagent. During the photocatalytic test in DI water, 2.0 mL of the reaction suspension were extracted and filtered at predetermined time intervals. Subsequently, 50  $\mu\text{L}$  of the fluorescent reagent was added to the obtained solution and allowed to stand for 10min. The product of the reaction between  $\text{H}_2\text{O}_2$  and the fluorescent reagent (maximum emission at 409nm) could be detected by PL under 315 nm excitation<sup>3</sup>.

**Text S6.** The methods of theoretical calculations

SMT molecules were constructed in Gaussian 09 and optimized using the 6-31 G (d, p) basis set (B3LYP/6-311 G + (d, p)) in the hybrid density functional B3LYP method. The positions of HOMO (Highest occupied molecular orbital) and LUMO (Lowest unoccupied molecular orbital) of SMT molecule were determined <sup>4</sup>.

**Text S7.** Identification of photocatalytic degradation intermediates

The photocatalytic degradation intermediates of Sulfamethazine (SMT) were identified by ultraperformance liquid chromatography with quadrupole time-of-flight mass spectrometry (UHPLC-Q-TOF-MS, Thermo Scientific Ultimate 3000 RSLC and Q Exactive Orbitrap, USA). A Hypersil GOLD C18 column (100 x 2.1 mm, 1.9  $\mu\text{m}$ ) was used to separate the samples. The column temperature was maintained at 40°C and the injection volume was 5  $\mu\text{L}$ . The elution was performed using  $\text{H}_2\text{O}$  containing 0.1 % (v/v) formic acid as eluent A and methanol as eluent B at a flow rate of 0.3  $\text{mL min}^{-1}$ . Mass spectral analysis was conducted in both positive and negative mode, and the scan range of the mass spectrum was  $m/z$  50-750 <sup>5</sup>.

**Text S8.** The fitting method for time-resolved fluorescence decay spectroscopy

The fluorescence decay curves of the PhC<sub>2</sub>Cu and PAM40 were fitted using the triple-exponential function:

$$R(t) = B_1 \exp\left(-\frac{t}{\tau_1}\right) + B_2 \exp\left(-\frac{t}{\tau_2}\right) + B_3 \exp\left(-\frac{t}{\tau_3}\right)$$

where  $B_1$ ,  $B_2$ , and  $B_3$  are the pre-exponential factor, and  $\tau_1$ ,  $\tau_2$ , and  $\tau_3$  are the radiative lifetime.

The specific fitting data is given in Table S1. The average radiative lifetime ( $\tau_{ave}$ ) can be calculated by the following equation:

$$\tau_{ave} = \frac{B_1 \tau_1^2 + B_2 \tau_2^2 + B_3 \tau_3^2}{B_1 \tau_1 + B_2 \tau_2 + B_3 \tau_3}$$

**Table S1.** The fitted fluorescence decay components of PhC<sub>2</sub>Cu and PAM40.

| Sample              | $\tau_1$ | $\tau_2$ | $\tau_3$ | B <sub>1</sub> | B <sub>2</sub> | B <sub>3</sub> | Average radiative<br>lifetime (ns) |
|---------------------|----------|----------|----------|----------------|----------------|----------------|------------------------------------|
| PhC <sub>2</sub> Cu | 0.2779   | 1.5793   | 10.3560  | 0.036(20.63%)  | 0.006(20.91%)  | 0.003(58.46%)  | 9.82                               |
| PAM40               | 0.0481   | 1.4957   | 6.1645   | 0.265(37.54%)  | 0.006(26.81%)  | 0.002(35.65%)  | 1.22                               |

**Table S2. Comparison of reported literature on photocatalytic reduction of SMT**

| Photocatalyst                                             | Dosage  | Initial SMT<br>concentration | Light source                  | $K_{\text{obs}}$<br>( $\text{min}^{-1}$ ) | Photocatalytic<br>performance | CB<br>(vs. NHE) | VB<br>(vs. NHE) | Ref.     |
|-----------------------------------------------------------|---------|------------------------------|-------------------------------|-------------------------------------------|-------------------------------|-----------------|-----------------|----------|
| <b>PhC<sub>2</sub>Cu/Ag/Ag<sub>2</sub>MoO<sub>4</sub></b> | 0.4 g/L | 10 mg/L                      | 9 W LED lamp<br>(455 nm)      | 0.1622                                    | 97.70 %<br>(20 min)           | -2.20 eV        | 3.08 eV         | Our work |
| <b>AgI/Bi<sub>4</sub>V<sub>2</sub>O<sub>11</sub></b>      | 1.0 g/L | 10 mg/L                      | 300 W Xenon<br>lamp (>420 nm) | 0.0431                                    | 91.47 %<br>(60 min)           | -0.40 eV        | 2.97 eV         | 6        |
| <b>LCN</b>                                                | 0.5 g/L | 100 $\mu\text{M}$            | 300 W Xenon<br>lamp (>420 nm) | 0.1062                                    | 99.70%<br>(60 min)            | -1.04 eV        | 1.51 eV         | 7        |
| <b>BCM/g-C<sub>3</sub>N<sub>4</sub></b>                   | 1.0 g/L | 10 mg/L                      | 300 W Xenon<br>lamp (>420 nm) | -                                         | 90.00 %<br>(60 min)           | -0.79 eV        | 1.23 eV         | 8        |
| <b>O-C<sub>3</sub>N<sub>4</sub></b>                       | 1.0 g/L | 10 mg/L                      | 200W LED lamp<br>(420 nm)     | -                                         | 96.54 %<br>(120 min)          | -0.72 eV        | 1.58 eV         | 9        |

|                                                                                  |         |         |                               |         |                      |          |         |    |
|----------------------------------------------------------------------------------|---------|---------|-------------------------------|---------|----------------------|----------|---------|----|
| <b>AgCl/MIL-100(Fe)</b>                                                          | 0.5 g/L | 1 mg/L  | 500 W Tungsten lamp (>400 nm) | 0.03969 | 99.50 %<br>(120 min) | -0.61eV  | 3.02eV  | 4  |
| <b>F-TiO<sub>2</sub>/g-C<sub>3</sub>N<sub>4</sub></b>                            | 0.5 g/L | 10 mg/L | 300 W Xenon lamp (>420 nm)    | 0.0435  | >98 %<br>(60 min)    | -1.06eV  | 2.63eV  | 10 |
| <b>Bi<sub>2</sub>O<sub>3</sub>-TiO<sub>2</sub></b>                               | 1.0 g/L | 20 mg/L | 300 W Xenon                   | 0.0291  | 100 %<br>(120 min)   | -        | -       | 11 |
| <b>CN-SA</b>                                                                     | 0.5 g/L | 10 mg/L | 300 W Xenon lamp (>420 nm)    | 0.0823  | 99 %<br>(60 min)     | -0.7 6eV | 1.64 eV | 12 |
| <b>m-Bi<sub>2</sub>O<sub>4</sub>-P</b>                                           | 0.4 g/L | 8 mg/L  | 350 W Xenon lamp (>420 nm)    | 0.0710  | -<br>(60 min)        | -0.75eV  | 1.38 eV | 13 |
| <b>CuFe<sub>2</sub>O<sub>4</sub>/MXene<br/>(CFO/Ti<sub>3</sub>C<sub>2</sub>)</b> | 0.5 g/L | 40 mg/L | 300 W Xenon lamp (>420nm)     | 0.0128  | 70 %<br>(70 min)     | -1.12eV  | 0.31eV  | 14 |

---

**Table S3.** Transformation products from the photocatalytic degradation of SMT under visible light irradiation. Products, labeled P1-P9 were identified by UPLC-Q-TOF MS.

| Name | Retention time<br>(min) | [M+H] <sup>+</sup> | Molecular<br>weight (Da) | Chemical formula                                                | Probable structure                                                                   |
|------|-------------------------|--------------------|--------------------------|-----------------------------------------------------------------|--------------------------------------------------------------------------------------|
| SMT  | 7.07                    | 279.0907           | 278                      | C <sub>12</sub> H <sub>14</sub> N <sub>4</sub> O <sub>2</sub> S | 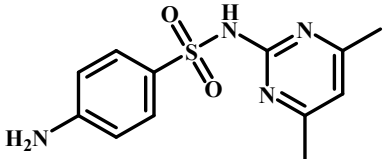  |
| P1   | 17.52                   | 173.0783           | 172                      | C <sub>6</sub> H <sub>8</sub> N <sub>2</sub> O <sub>2</sub> S   | 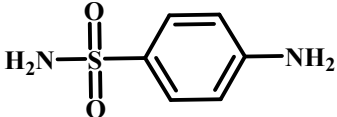 |

|    |       |          |     |               |                                                                                      |
|----|-------|----------|-----|---------------|--------------------------------------------------------------------------------------|
| P2 | 11.82 | 158.1539 | 157 | $C_6H_7NO_2S$ | 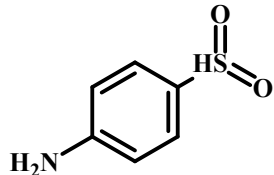  |
| P3 | 13.33 | 175.1481 | 174 | $C_6H_7NO_3S$ | 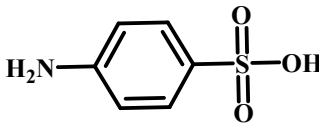  |
| P4 | 13.33 | 111.0442 | 110 | $C_6H_7NO$    | 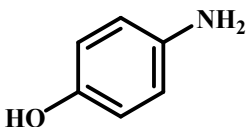  |
| P5 | 6.89  | 124.0870 | 123 | $C_6H_9N_3$   | 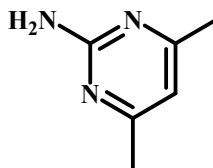 |

|    |       |          |     |                       |                                                                                     |
|----|-------|----------|-----|-----------------------|-------------------------------------------------------------------------------------|
| P6 | 4.28  | 215.1290 | 214 | $C_{12}H_{14}N_4$     | 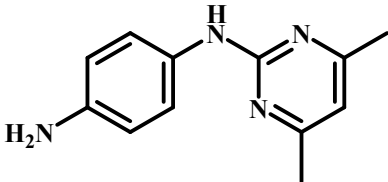 |
| P7 | 14.13 | 295.2239 | 294 | $C_{12}H_{14}N_4O_3S$ | 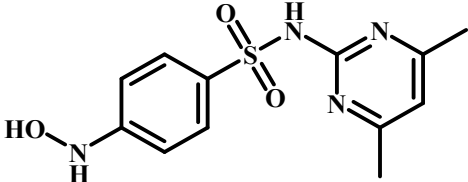 |
| P8 | 2.03  | 190.9542 | 189 | $C_6H_7NO_4S$         | 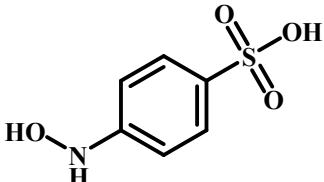 |

---

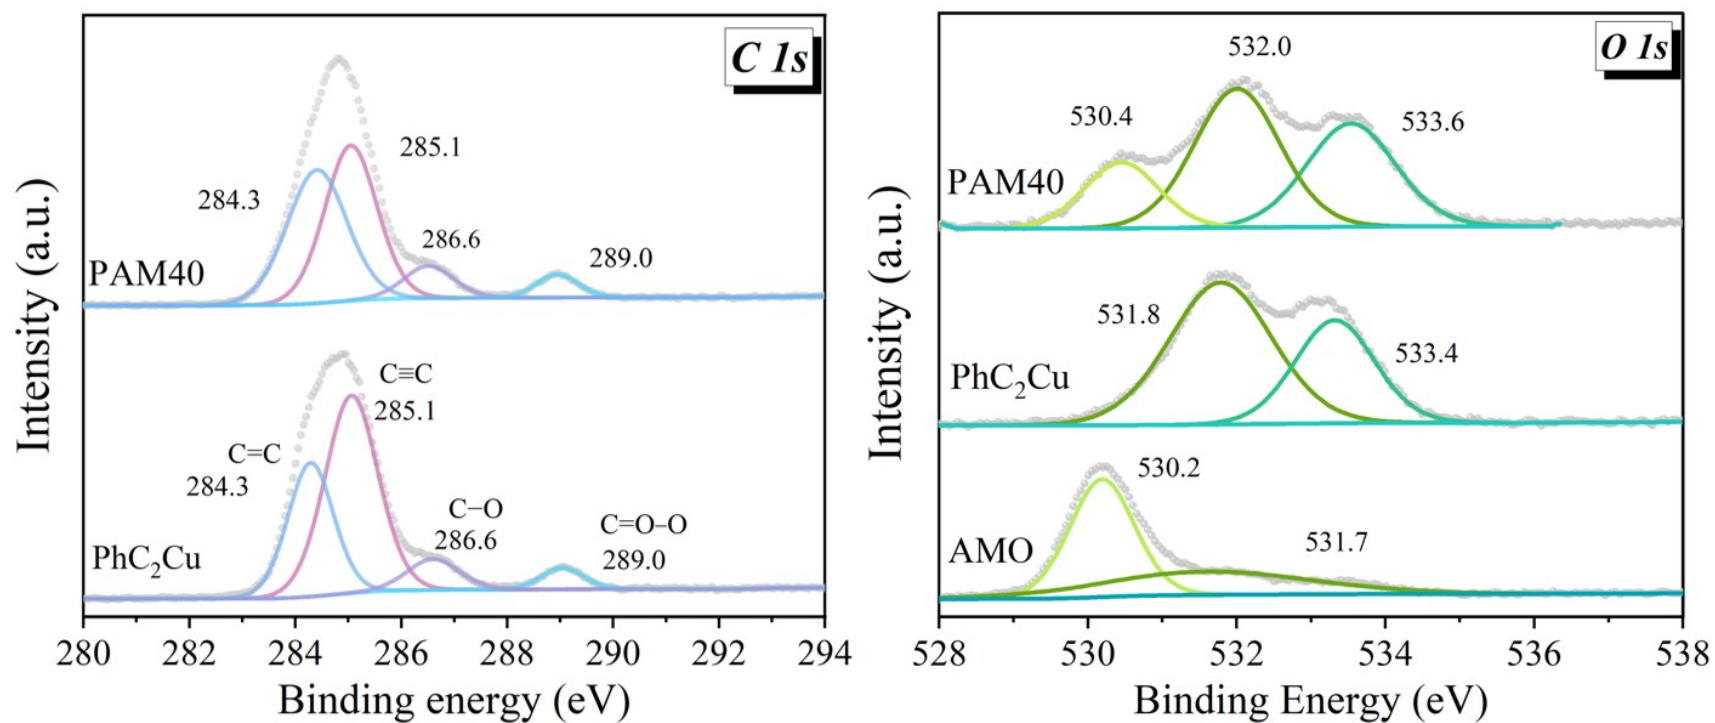

**Fig. S1.** High-resolution XPS spectra of as-prepared samples: (a) C 1s, (b) O 1s.

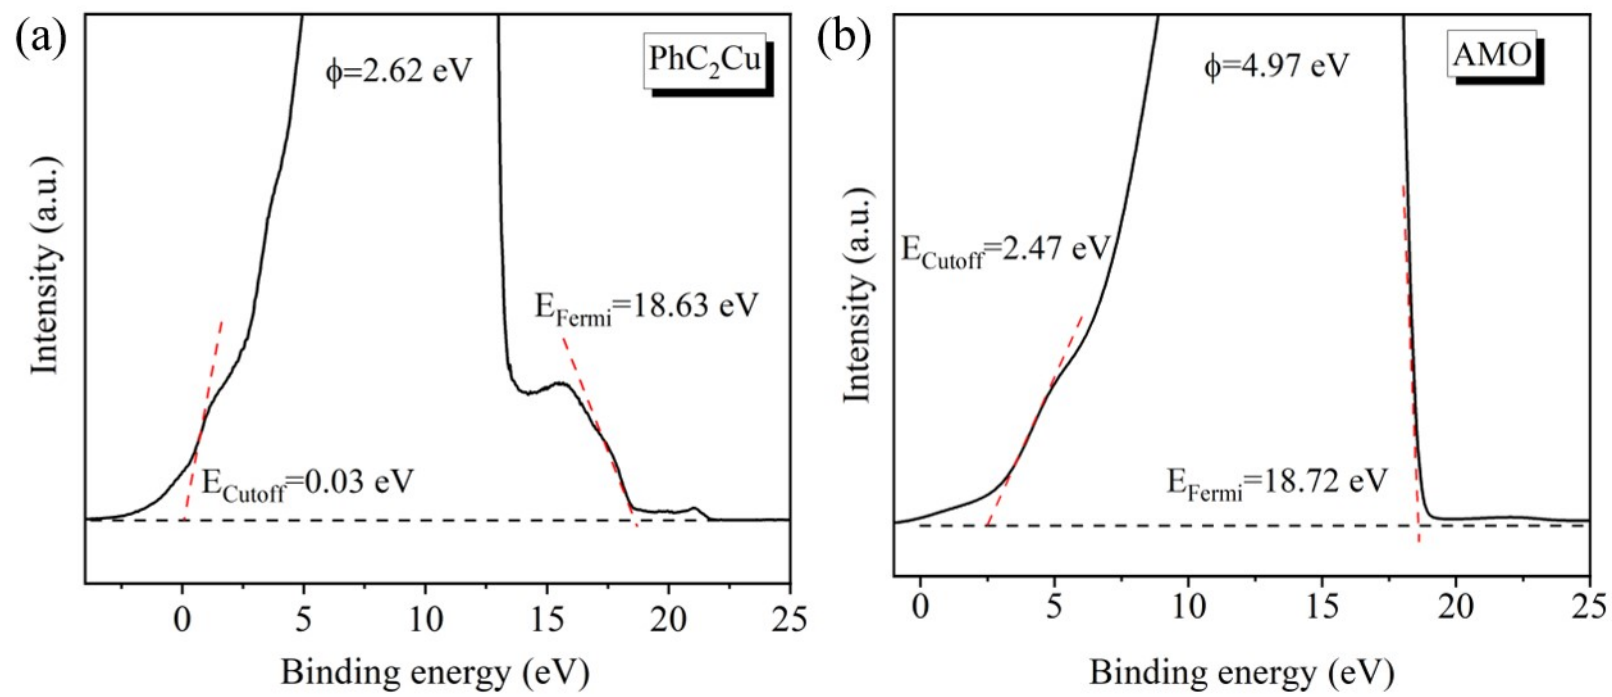

**Fig. S2.** UPS spectra of PhC2Cu and AMO.

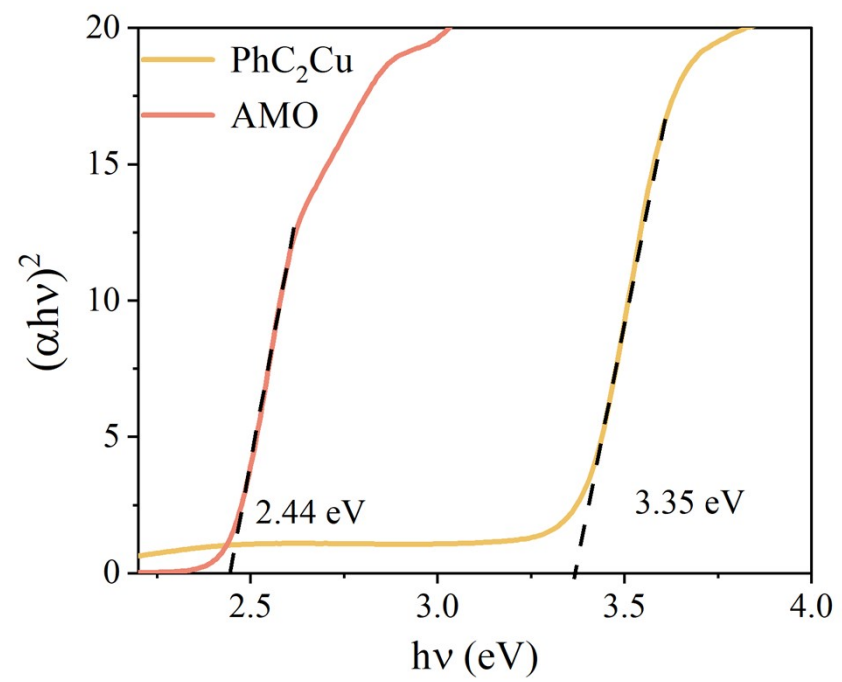

**Fig. S3.** Tauc plots of PhC<sub>2</sub>Cu and AMO.

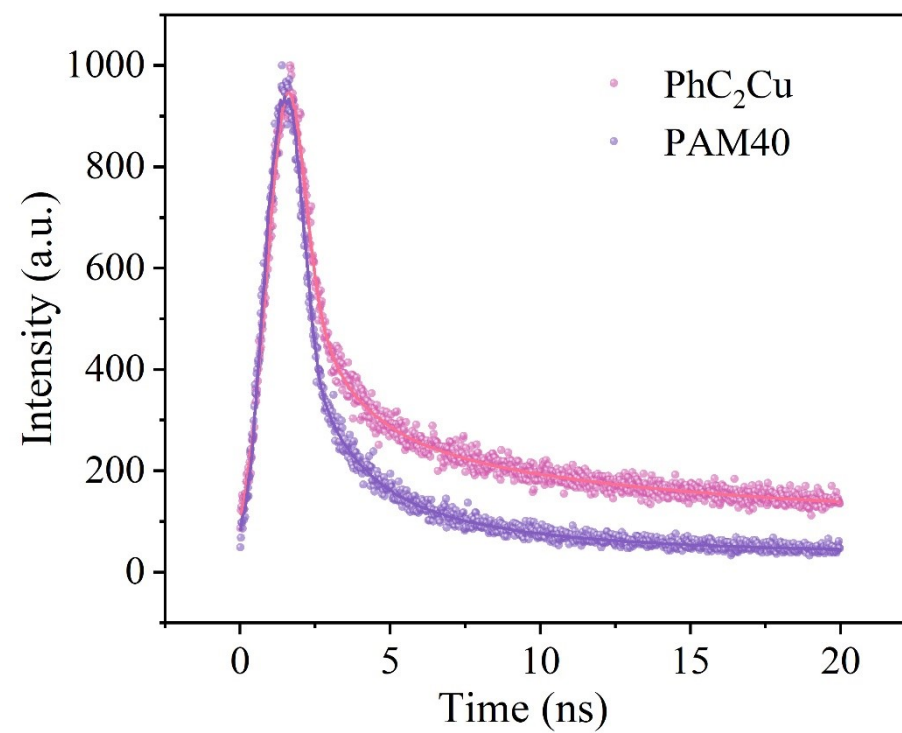

**Fig. S4.** Time-resolved fluorescence decay spectra.

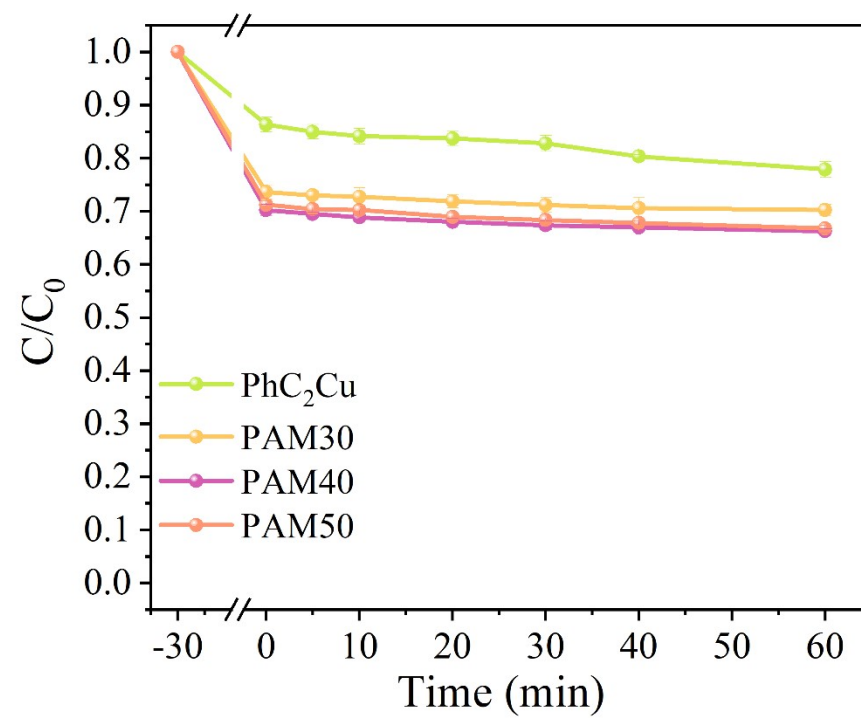

**Fig. S5.** Adsorption experiments of different samples in the dark.

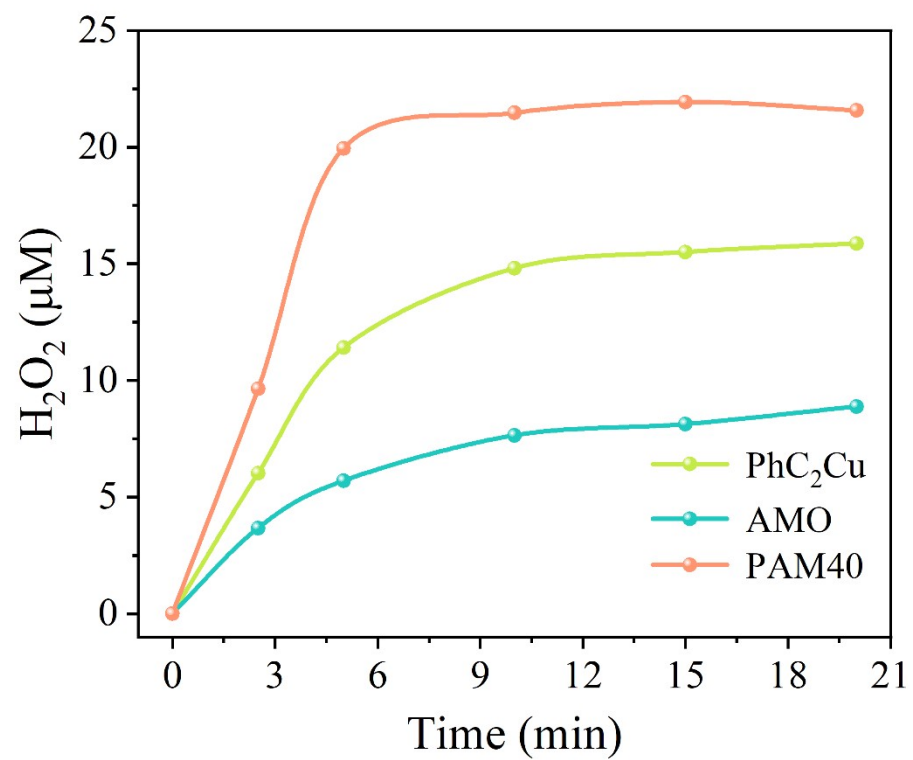

**Fig. S6.** Comparison of  $\text{H}_2\text{O}_2$  generation by the  $\text{PhC}_2\text{Cu}$ , AMO and PAM40 systems under the same conditions.

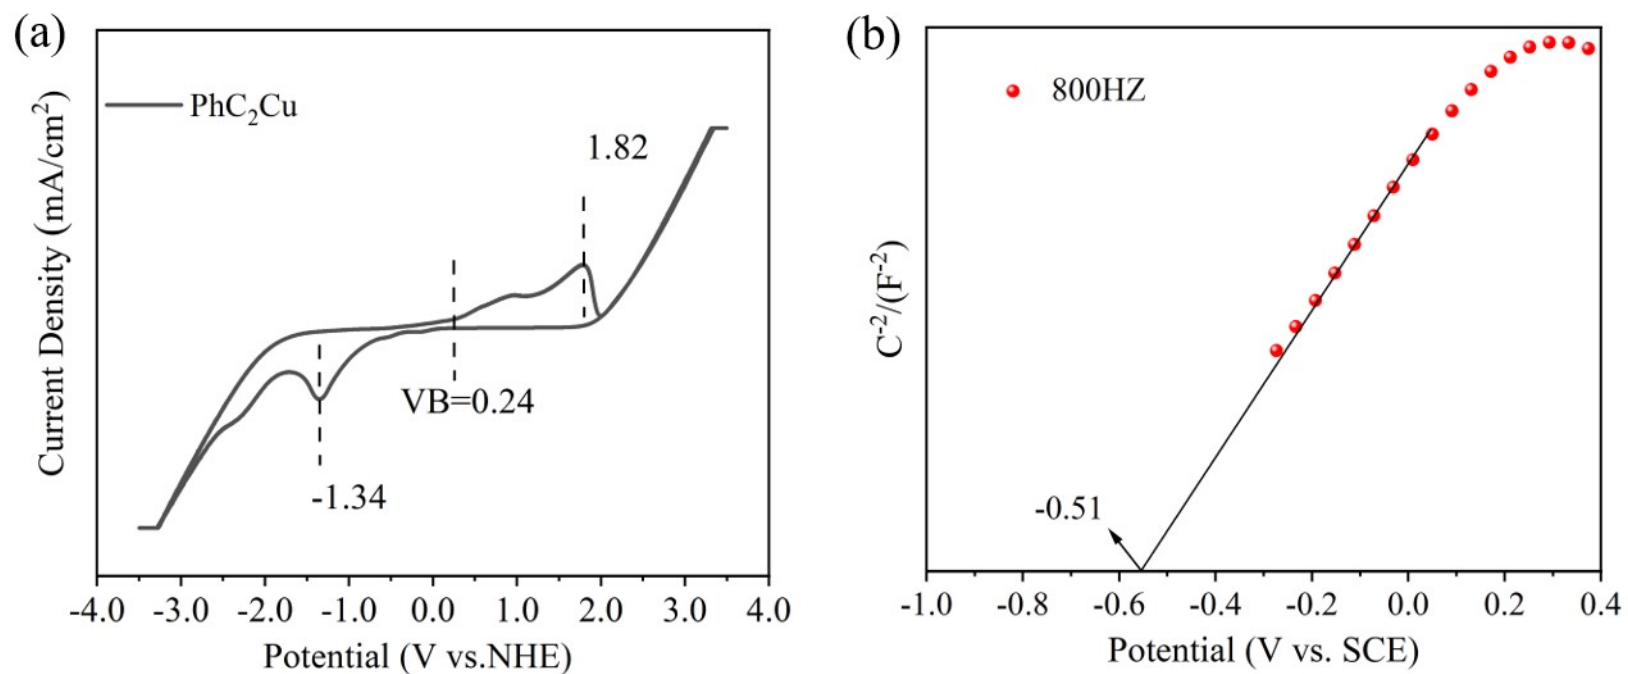

**Fig. S7.** (a) Cyclic voltammogram of  $\text{PhC}_2\text{Cu}$ . (b). Mott-Schottky curves of AMO at 800 Hz.

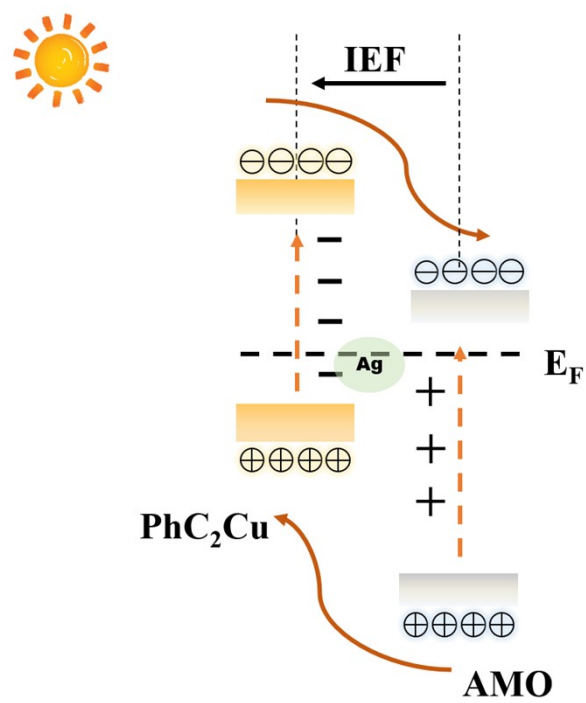

**Fig. S8.** Schematic illustration of conventional type II heterojunctions.

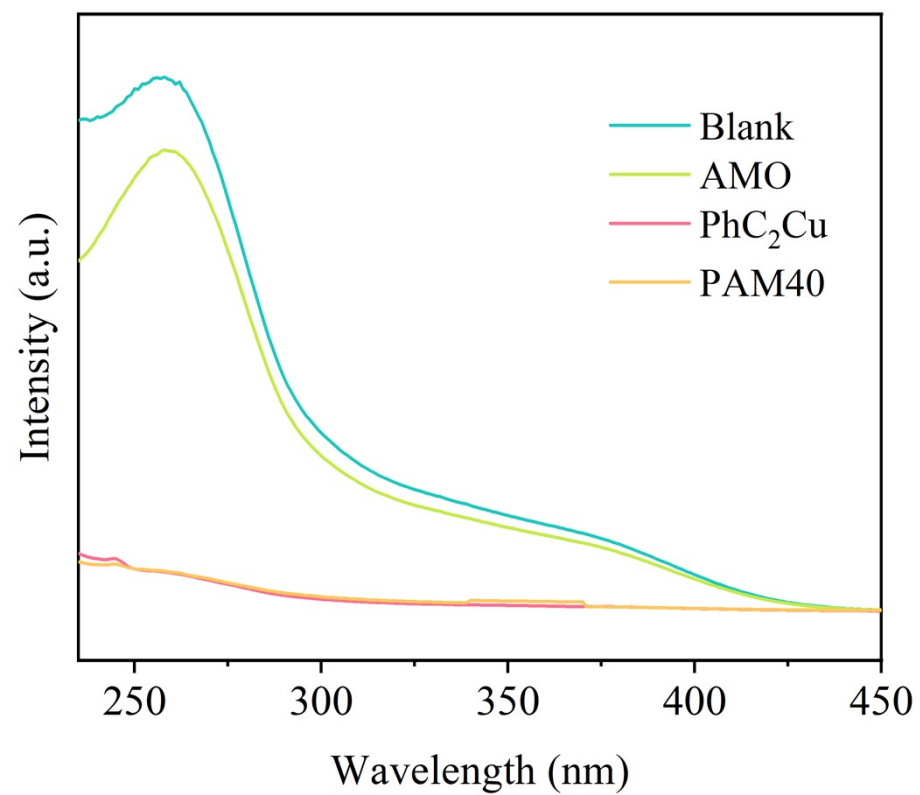

**Fig. S9.** The UV absorption spectra of NBT after 30 min in photocatalytic process.

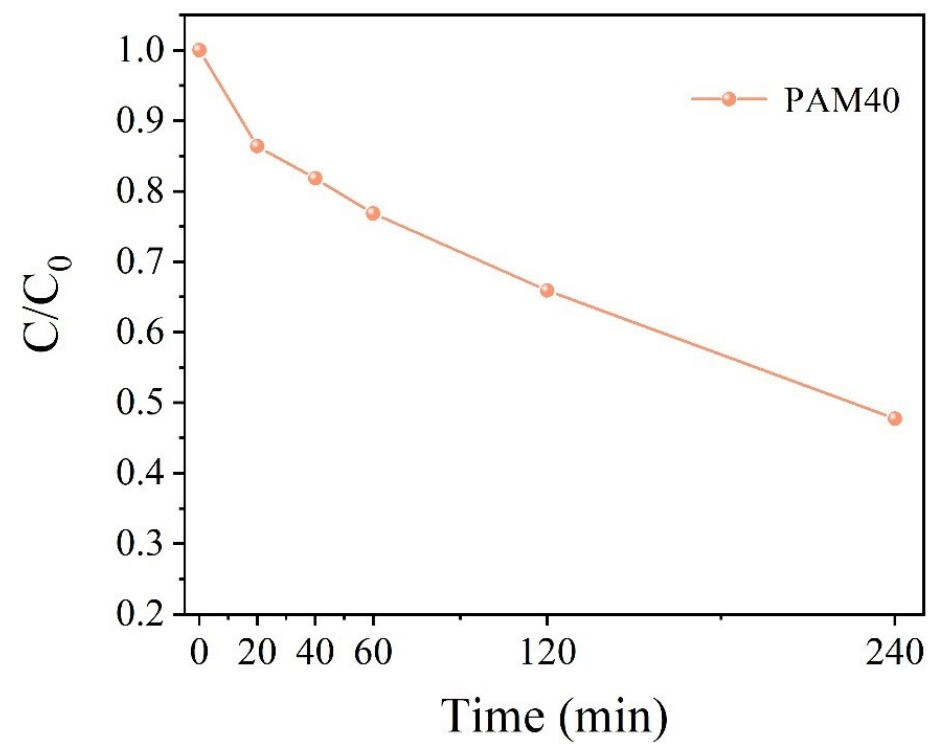

**Fig. S10.** TOC removal rate of SMT solution following 240 min of light exposure.

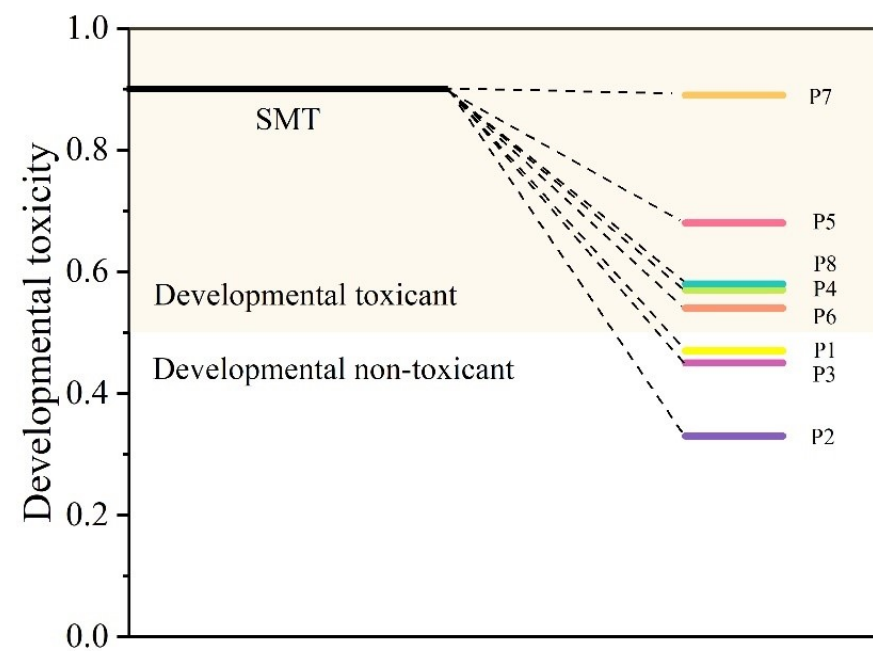

**Fig. S11.** Developmental toxicity of SMT and degradation intermediates/products.

## REFERENCES

1. D. Li, C. Wen, J. Huang, J. Zhong, P. Chen, H. Liu, Z. Wang, Y. Liu, W. Lv and G. Liu, High-efficiency ultrathin porous phosphorus-doped graphitic carbon nitride nanosheet photocatalyst for energy production and environmental remediation, *Applied Catalysis B: Environmental*, 2022, **307**.
2. J. Guo, H. Sun, X. Yuan, L. Jiang, Z. Wu, H. Yu, N. Tang, M. Yu, M. Yan and J. Liang, Photocatalytic degradation of persistent organic pollutants by Co-Cl bond reinforced CoAl-LDH/Bi(12)O(17)Cl(2) photocatalyst: mechanism and application prospect evaluation, *Water Res*, 2022, **219**, 118558.
3. X. Jin, Y. Wu, Z. Lin, D. Liang, F. Wang, X. Zheng, H. Liu, W. Lv and G. Liu, Plasmonic Ag nanoparticles decorated copper-phenylacetylide polymer for visible-light-driven photocatalytic reduction of Cr(VI) and degradation of PPCPs: Performance, kinetics, and mechanism, *J Hazard Mater*, 2022, **425**, 127599.
4. R. Ning, H. Pang, Z. Yan, Z. Lu, Q. Wang, Z. Wu, W. Dai, L. Liu, Z. Li, G. Fan and X. Fu, An innovative S-scheme AgCl/MIL-100(Fe) heterojunction for visible-light-driven degradation of sulfamethazine and mechanism insight, *J Hazard Mater*, 2022, **435**, 129061.
5. C. Tan, Q. Zhang, X. Zheng, H. Liu, P. Chen, W. Zhang, Y. Liu, W. Lv and G. Liu, Photocatalytic degradation of sulfonamides in 4-

phenoxyphenol-modified g-C<sub>3</sub>N<sub>4</sub> composites: Performance and mechanism, *Chemical Engineering Journal*, 2021, **421**.

6. X. J. Wen, L. Qian, X. X. Lv, J. Sun, J. Guo, Z. H. Fei and C. G. Niu, Photocatalytic degradation of sulfamethazine using a direct Z-Scheme AgI/Bi(4)V(2)O(11) photocatalyst: Mineralization activity, degradation pathways and promoted charge separation mechanism, *J Hazard Mater*, 2020, **385**, 121508.

7. C. Zhou, Z. Zeng, G. Zeng, D. Huang, R. Xiao, M. Cheng, C. Zhang, W. Xiong, C. Lai, Y. Yang, W. Wang, H. Yi and B. Li, Visible-light-driven photocatalytic degradation of sulfamethazine by surface engineering of carbon nitride : Properties, degradation pathway and mechanisms, *Journal of Hazardous Materials*, 2019, **380**.

8. C. Zhou, C. Lai, D. Huang, G. Zeng, C. Zhang, M. Cheng, L. Hu, J. Wan, W. Xiong, M. Wen, X. Wen and L. Qin, Highly porous carbon nitride by supramolecular preassembly of monomers for photocatalytic removal of sulfamethazine under visible light driven, *Applied Catalysis B: Environmental*, 2018, **220**, 202-210.

9. Q. Wang, M. Xiao, Z. Peng, C. Zhang, X. Du, Z. Wang and W. Wang, Visible LED photocatalysis combined with ultrafiltration driven by metal-free oxygen-doped graphitic carbon nitride for sulfamethazine degradation, *J Hazard Mater*, 2022, **439**, 129632.

10. P. Chen, S. Di, X. Qiu and S. Zhu, One-step synthesis of F-TiO<sub>2</sub>/g-C<sub>3</sub>N<sub>4</sub> heterojunction as highly efficient visible-light-active catalysts for

tetrabromobisphenol A and sulfamethazine degradation, *Applied Surface Science*, 2022, **587**.

11. N. Wang, X. Li, Y. Yang, Z. Zhou, Y. Shang, X. Zhuang and T. Zhang, Two-stage calcination composite of Bi<sub>2</sub>O<sub>3</sub>-TiO<sub>2</sub> supported on powdered activated carbon for enhanced degradation of sulfamethazine under solar irradiation, *Journal of Water Process Engineering*, 2020, **35**.

12. C. Zhou, D. Huang, P. Xu, G. Zeng, J. Huang, T. Shi, C. Lai, C. Zhang, M. Cheng, Y. Lu, A. Duan, W. Xiong and M. Zhou, Efficient visible light driven degradation of sulfamethazine and tetracycline by salicylic acid modified polymeric carbon nitride via charge transfer, *Chemical Engineering Journal*, 2019, **370**, 1077-1086.

13. P. Chen, Q. Zhang, X. Zheng, C. Tan, M. Zhuo, T. Chen, F. Wang, H. Liu, Y. Liu, Y. Feng, W. Lv and G. Liu, Phosphate-modified m-Bi<sub>2</sub>O<sub>4</sub> enhances the absorption and photocatalytic activities of sulfonamide: Mechanism, reactive species, and reactive sites, *J Hazard Mater*, 2020, **384**, 121443.

14. Y. Cao, Y. Fang, X. Lei, B. Tan, X. Hu, B. Liu and Q. Chen, Fabrication of novel CuFe<sub>2</sub>O<sub>4</sub>/MXene hierarchical heterostructures for enhanced photocatalytic degradation of sulfonamides under visible light, *J Hazard Mater*, 2020, **387**, 122021.

15. Y.-C. Zhou, X.-Y. Xu, P. Wang, H. Fu, C. Zhao and C.-C. Wang, Facile fabrication and enhanced photocatalytic performance of visible light responsive UiO-66-NH<sub>2</sub>/Ag<sub>2</sub>CO<sub>3</sub> composite, *Chinese Journal of Catalysis*, 2019, **40**, 1912-1923.

16. W. Zhang, L. Wang and J. Zhang, Preparation of Ag UiO-66-NH<sub>2</sub> and its application in photocatalytic reduction of Cr(VI) under visible light, *Research on Chemical Intermediates*, 2019, **45**, 4801-4811.
17. Y.-X. Li, X. Wang, C.-C. Wang, H. Fu, Y. Liu, P. Wang and C. Zhao, S-TiO<sub>2</sub>/UiO-66-NH<sub>2</sub> composite for boosted photocatalytic Cr(VI) reduction and bisphenol A degradation under LED visible light, *Journal of Hazardous Materials*, 2020, **399**, 123085.
18. X. Wei, C. C. Wang, Y. Li, P. Wang and Q. Wei, The Z-scheme NH<sub>2</sub>-UiO-66/PTCDA composite for enhanced photocatalytic Cr(VI) reduction under low-power LED visible light, *Chemosphere*, 2021, **280**, 130734.
